# Supplementary material
Source: PubMed Central journal article supplement (PMC7736253)
Supplement: NIHMS1640018-supplement-1640018_Supp_Tab1-2.pdf [file NIHMS1640018-supplement-1640018_Supp_Tab1-2.pdf]

**Supplementary Table 1 | Cryo-EM data collection and refinement.**

|                                                  | #1 Apo<br>Rubisco<br>(EMDB-22401)<br>(PDB 7JN4)<br>(EMPIAR-10503) | #2 EPYC1 <sub>49-72</sub> peptide-<br>bound Rubisco<br>(EMDB-22308)<br>(PDB 7JFO)<br>(EMPIAR-10502) | #3 EPYC1 <sub>106-135</sub> peptide-<br>bound Rubisco<br>(EMDB-22462)<br>(PDB 7JSX)<br>(EMPIAR-10501) |
|--------------------------------------------------|-------------------------------------------------------------------|-----------------------------------------------------------------------------------------------------|-------------------------------------------------------------------------------------------------------|
| Voltage (kV)                                     | 300                                                               | 300                                                                                                 | 300                                                                                                   |
| Camera/detector                                  | K2                                                                | K2                                                                                                  | K3                                                                                                    |
| Magnification                                    | 22,500                                                            | 22,500                                                                                              | 81,000                                                                                                |
| Pixel size (Å)                                   | 1.31                                                              | 0.655                                                                                               | 0.844                                                                                                 |
| Defocus range (μm)                               | -1.5 to -3.0                                                      | -1.5 to -3.0                                                                                        | -1 to -1.6                                                                                            |
| Exposure time (s)                                | 10                                                                | 10                                                                                                  | 3.56                                                                                                  |
| No. movie frames                                 | 50                                                                | 50                                                                                                  | 60                                                                                                    |
| Electron dose (e <sup>-</sup> /Å <sup>2</sup> )  | 58                                                                | 58                                                                                                  | 60                                                                                                    |
| No. micrographs                                  | 1,834                                                             | 2,500                                                                                               | 13,727                                                                                                |
| No. initial particles                            | 677,071                                                           | 1,809,869                                                                                           | 2,257,131                                                                                             |
| No. final particle                               | 491,395                                                           | 945,755                                                                                             | 152,839                                                                                               |
| Symmetry                                         | D4                                                                | D4                                                                                                  | D4                                                                                                    |
| Resolution (Å)                                   | 2.68                                                              | 2.13                                                                                                | 2.06                                                                                                  |
| Map sharpening <i>B</i> factor (Å <sup>2</sup> ) | -100.04                                                           | -77.55                                                                                              | -47.75                                                                                                |

**Supplementary Table 2 | The amino acid residues that form the Rubisco-binding regions on EPYC1 homologs and the residues that form the EPYC1 binding site on the surface of Rubisco, appear to be conserved across the order Volvocales.** Residues with roles in the binding interface are bolded. Residues that are different from the *Chlamydomonas reinhardtii* sequence are highlighted in grey.

| Species                          | First Rubisco-binding region on EPYC1 homolog | Rubisco SSU helix A   | Rubisco SSU helix B              |
|----------------------------------|-----------------------------------------------|-----------------------|----------------------------------|
| <i>Chlamydomonas reinhardtii</i> | TRSVLPAN <b>WRQ<b>E</b>LESLRN</b>             | <b>DE</b> QIAAQVDYIVA | PMQV <b>LR</b> EIVACTKA          |
| <i>Tetrabaena socialis</i>       | TRSVLPAN <b>WRQ<b>E</b>LESLRG</b>             | <b>DE</b> QIAAQVDYIVA | PMQV <b>LR</b> EIV <b>SCT</b> RA |
| <i>Gonium pectorale</i>          | TRSVLPAN <b>WRQ<b>E</b>LESLRN</b>             | <b>DE</b> QIAAQVDYIVA | PMQV <b>LR</b> EIVACTKA          |
| <i>Volvox carteri</i>            | TRSVLPAN <b>WRQ<b>E</b>LESLRN</b>             | <b>DE</b> QIAAQVDYIVA | PMQV <b>LR</b> EIVACTKA          |
